# Supplementary material
Source: HighWire-hosted journal article supplement (https://erj.ersjournals.com/content/54/3/1901417)
Supplement: inline-supplementary-material-1 [file inline-supplementary-material-1.pdf]

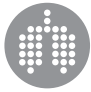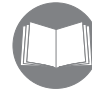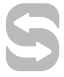

SHAREABLE PDF

# H2020 funding for respiratory research: scaling up for the prevention and treatment of lung diseases

Constantine I. Vardavas<sup>1,2</sup>, Christina N. Kyriakos <sup>1,2</sup>, Esteve Fernández <sup>3</sup>, Panagiotis Bamidis<sup>4</sup>, Kamran Siddiqi <sup>5,6</sup>, Niels H. Chavannes<sup>7</sup>, R.M.J.J. van der Kleij<sup>7</sup>, Gary Parker<sup>8</sup>, Cornel Radu-Loghin<sup>2</sup>, Brian Ward<sup>9</sup> and Karim Berkouk<sup>10</sup>

**Affiliations:** <sup>1</sup>School of Medicine, University of Crete, Heraklion, Greece. <sup>2</sup>European Network for Smoking and Tobacco Prevention, Brussels, Belgium. <sup>3</sup>WHO Collaborating Center for Tobacco Control, Catalan Institute of Oncology, Bellvitge Institute for Biomedical Research, University of Barcelona, L'Hospitalet de Llobregat, Catalonia, Spain. <sup>4</sup>Lab of Medical Physics, School of Medicine, Aristotle University of Thessaloniki, Thessaloniki, Greece. <sup>5</sup>Dept of Health Sciences, The University of York, York, UK. <sup>6</sup>Hull-York Medical School, York, UK. <sup>7</sup>Dept of Public Health and Primary Care, Leiden University Medical Center, Leiden, The Netherlands. <sup>8</sup>Global Alliance for Chronic Diseases, London, UK. <sup>9</sup>European Respiratory Society, EU Affairs, Brussels, Belgium. <sup>10</sup>European Commission, Directorate General for Research and Innovation, Health Directorate, Brussels, Belgium.

**Correspondence:** Constantine I. Vardavas, Laboratory of Toxicology, Faculty of Medicine, University of Crete, Heraklion, Greece. E-mail: vardavas@tobcontrol.eu

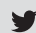

@ERSpublications

This European Lung Corner article summarises five key messages for future research and practice in preventing and treating lung diseases based on outcomes and perspectives from five Horizon 2020 projects <http://bit.ly/2YCJV5N>

**Cite this article as:** Vardavas CI, Kyriakos CN, Fernández E, *et al.* H2020 funding for respiratory research: scaling up for the prevention and treatment of lung diseases. *Eur Respir J* 2019; 54: 1901417 [<https://doi.org/10.1183/13993003.01417-2019>].

This single-page version can be shared freely online.

Respiratory diseases represent a significant public health challenge, in terms of disability and premature mortality, and also direct healthcare costs, drugs prescribed and the indirect costs related to lost productivity [1].
